# Supplementary material for: CRISPR-Cas9 target-strand nicking provides phage resistance by inhibiting replication
Source: PubMed Central journal article supplement (PMC11398490; doi:10.1101/2024.09.05.611540), 2024-09-05
Supplement: NIHPP2024.09.05.611540v1-supplement-2.pdf [file NIHPP2024.09.05.611540v1-supplement-2.pdf]

## Supplementary Figures

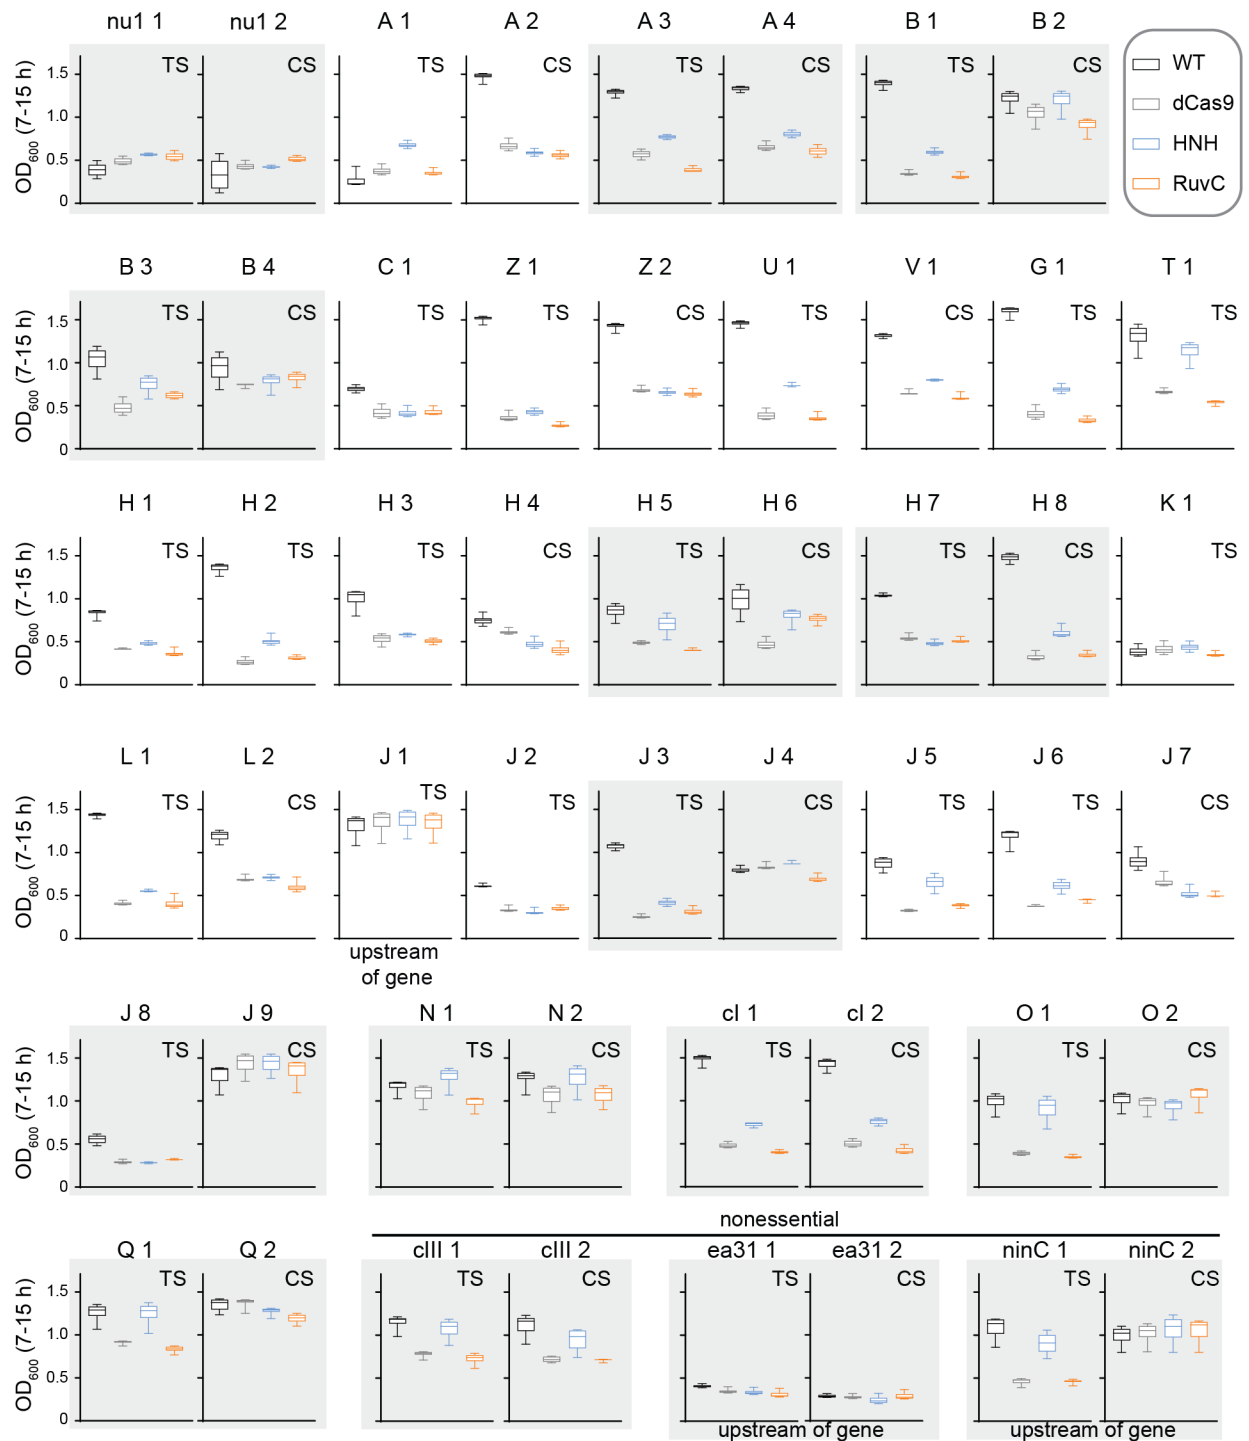

**Figure S1: Protection by Cas9 variants for additional guide RNAs.**

Box plots of OD<sub>600</sub> values over the 7-15 h time period of growth curves, summarizing protection by four Cas9 variants using different guide RNAs. The gene targeted by the guide RNA is indicated. Plots that are outlined together in gray represent guide RNAs that target the

same or overlapping regions on either the template strand (TS) or coding strand (CS). Guide RNAs targeting non-essential genes or non-coding regions are indicated. All gene targets are provided in the Supplementary tables.

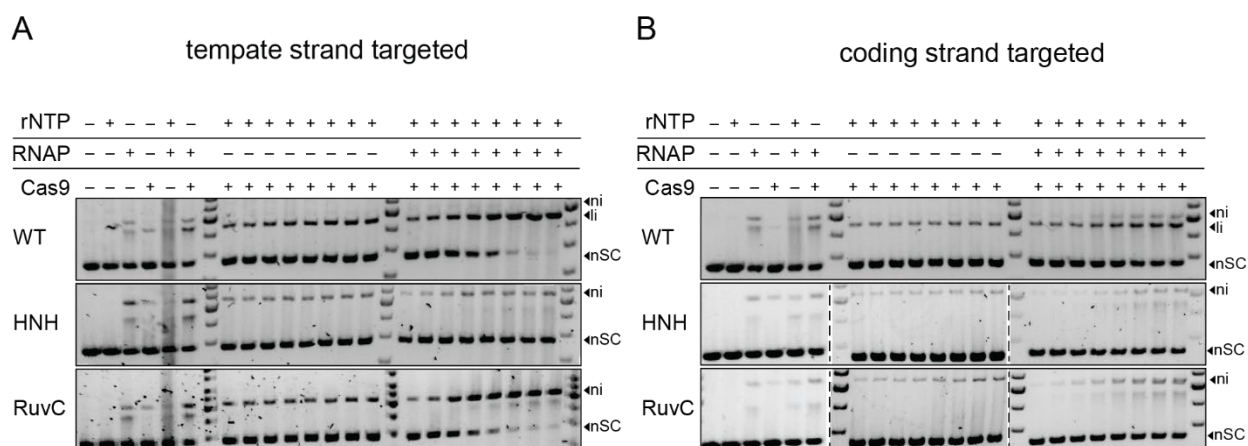

**Figure S2: Gels showing Cas9 turnover by T7 RNA polymerase**

Cleavage assays were performed with an excess of plasmid DNA over Cas9. In the absence of RNAP, only a fraction of the DNA is cleaved due to the lack of Cas9 turnover. When RNAP is added in the presence of rNTPs, Cas9 can turnover under some conditions tested, resulting in full cleavage of the DNA at longer time points.

A. The template strand of the target plasmid was targeted.

B. The coding strand of the target plasmid was targeted.

### Supplementary Tables

List of  $\lambda$  genome targets

Primers for *cas9* mutagenesis and plasmids for Cas9 expression

qPCR primers

Oligonucleotides for crRNA synthesis and targets for cleavage assays
